# Supplementary material for: Adaptive changes of human islets to an obesogenic environment in the mouse
Source: PubMed Central journal article supplement — Diabetologia. 2012 Nov 29;56(2):350–8. doi: 10.1007/s00125-012-2775-y (PMC3536990; doi:10.1007/s00125-012-2775-y), 2012-11-29
Supplement: 125_2012_2775_MOESM1_ESM.pdf [file 125_2012_2775_MOESM1_ESM.pdf]

**ESM Fig. 1**

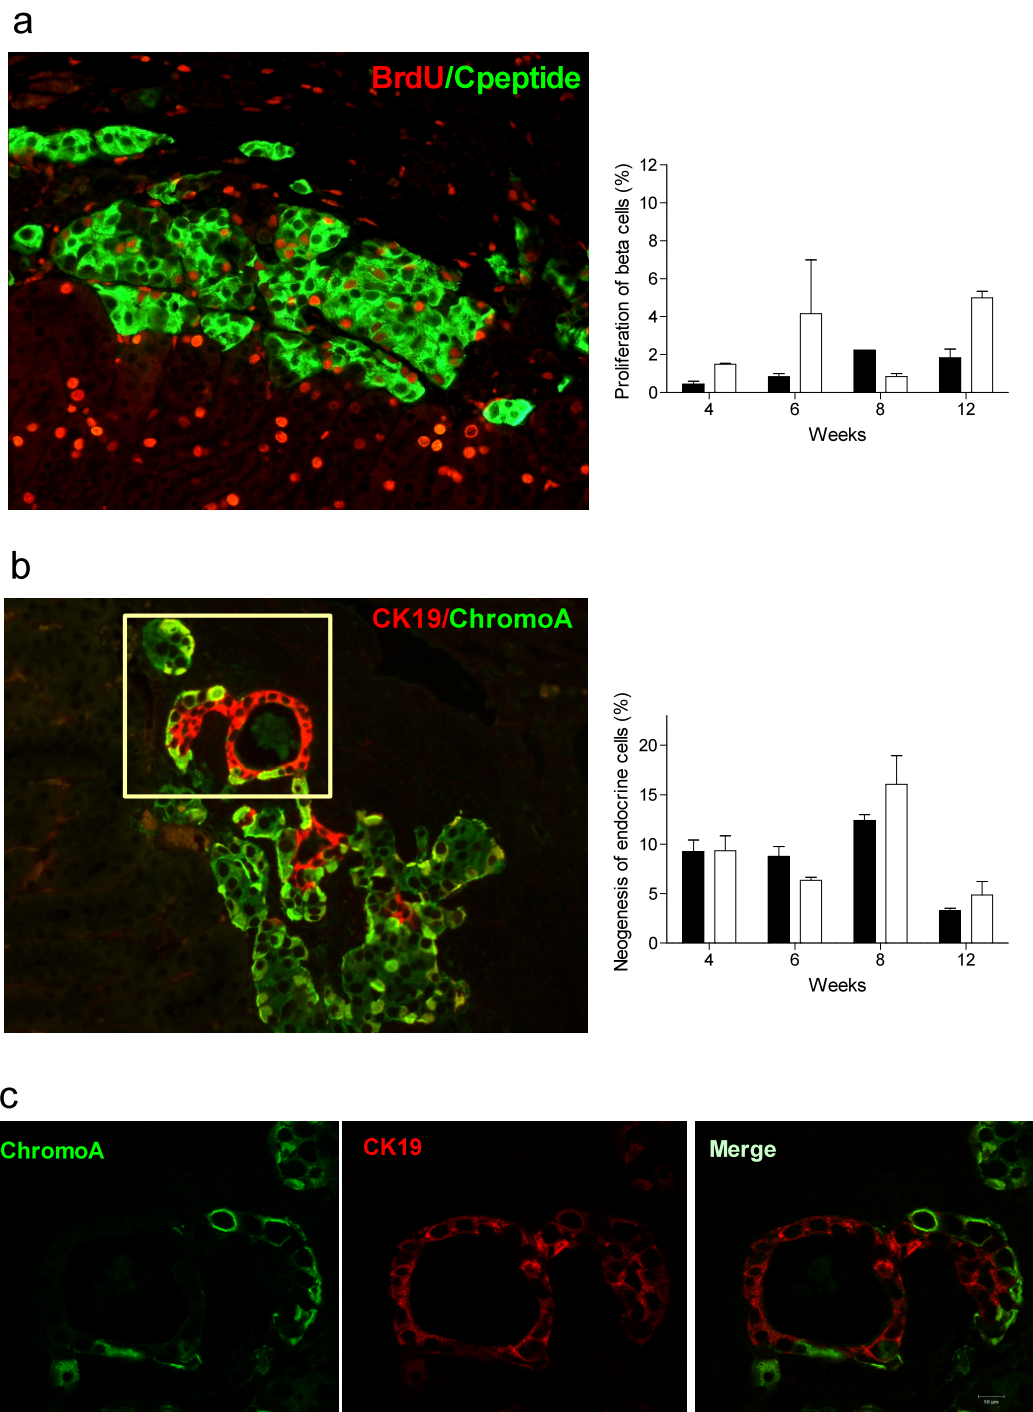

**Kinetic study to investigate the mechanisms of endocrine cell expansion in human grafts**

**a** Cumulative 7 day proliferation (7 days BrdU in drinking water) was assessed in paraffin embedded sections of human grafts stained with cpeptide (beta cells) and BrdU; (% double labeling/total beta cells) and **b** neogenesis was assessed with double labeling of CK19 (ductal cell marker) and chromogranin A (endocrine cell marker) at 4, 6, 8 and 12 weeks (%chromogranin A positive ductal cells/ total ductal cells) and **c** large magnification of ESM 1b in confocal microscope (Zeiss 710)
