# Supplementary material for: Adaptive changes of human islets to an obesogenic environment in the mouse
Source: PubMed Central journal article supplement — Diabetologia. 2012 Nov 29;56(2):350–8. doi: 10.1007/s00125-012-2775-y (PMC3536990; doi:10.1007/s00125-012-2775-y), 2012-11-29
Supplement: 125_2012_2775_MOESM2_ESM.pdf [file 125_2012_2775_MOESM2_ESM.pdf]

## ESM Fig. 2

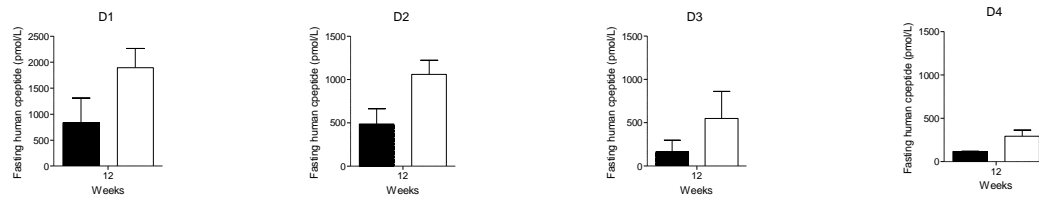

Effect of 12 week Control or high fat diet on fasting human cpeptide levels in individual donors (n=4). Control (black) and HFD (white)
