# Supplementary material for: Adaptive changes of human islets to an obesogenic environment in the mouse
Source: PubMed Central journal article supplement — Diabetologia. 2012 Nov 29;56(2):350–8. doi: 10.1007/s00125-012-2775-y (PMC3536990; doi:10.1007/s00125-012-2775-y), 2012-11-29
Supplement: 125_2012_2775_MOESM4_ESM.pdf [file 125_2012_2775_MOESM4_ESM.pdf]

**ESM Table 1:** Characteristics of non diabetic human donors

| <b>Donors</b> | <b>Sex<br/>H/F</b> | <b>Age<br/>years</b> | <b>BMI<br/>Kg/m<sup>2</sup></b> | <b>Hba1c<br/>%(mmol/mol)</b> | <b>Viability<br/>%</b> |
|---------------|--------------------|----------------------|---------------------------------|------------------------------|------------------------|
| <b>D1</b>     | M                  | 16                   | 19.5                            | 5.5(34.1)                    | 90.7                   |
| <b>D2</b>     | F                  | 41                   | 31.6                            | 6(37.2)                      | 98                     |
| <b>D3</b>     | M                  | 22                   | 20.5                            | 5.3(32.9)                    | 96.4                   |
| <b>D4</b>     | M                  | 16                   | 21.2                            | 5.3(32.9)                    | 94.8                   |
| <b>Mean</b>   |                    | 23.7±5.9             | 23.2±2.8                        | 5.5±0.16(34.2±1.02)          | 94.9±1.56              |
