# Supplementary material for: Adaptive changes of human islets to an obesogenic environment in the mouse
Source: PubMed Central journal article supplement — Diabetologia. 2012 Nov 29;56(2):350–8. doi: 10.1007/s00125-012-2775-y (PMC3536990; doi:10.1007/s00125-012-2775-y), 2012-11-29
Supplement: 125_2012_2775_MOESM5_ESM.pdf [file 125_2012_2775_MOESM5_ESM.pdf]

**ESM Table 2:** Characteristics of dysfunctional human donors

| <b>Donors</b>  | <b>Sex<br/>H/F</b> | <b>Age<br/>years</b> | <b>BMI<br/>Kg/m<sup>2</sup></b> | <b>Hba1c<br/>%(mmol/mol)</b> | <b>Viability<br/>%</b> |
|----------------|--------------------|----------------------|---------------------------------|------------------------------|------------------------|
| <b>Diab 1*</b> | M                  | 60                   | 24.1                            | 6.5                          | 98                     |
| <b>Diab 2</b>  | M                  | 59                   | 37.7                            | 7                            | 99.1                   |

\* treated for 10 years for type 2 diabetes
