# Supplementary material for: Adaptive changes of human islets to an obesogenic environment in the mouse
Source: PubMed Central journal article supplement — Diabetologia. 2012 Nov 29;56(2):350–8. doi: 10.1007/s00125-012-2775-y (PMC3536990; doi:10.1007/s00125-012-2775-y), 2012-11-29
Supplement: 125_2012_2775_MOESM6_ESM.pdf [file 125_2012_2775_MOESM6_ESM.pdf]

**ESM Table 3:** Research Diets (New Brunswick, NJ ref D12450B)

|                        | <b>Control</b> | <b>HFD</b> |
|------------------------|----------------|------------|
| <b>Protein (%)</b>     | 20             | 20         |
| <b>Carbohydrate(%)</b> | 70             | 20         |
| <b>Fat (%)</b>         | 10             | 60         |
