# Supplementary material for: Adaptive changes of human islets to an obesogenic environment in the mouse
Source: PubMed Central journal article supplement — Diabetologia. 2012 Nov 29;56(2):350–8. doi: 10.1007/s00125-012-2775-y (PMC3536990; doi:10.1007/s00125-012-2775-y), 2012-11-29
Supplement: 125_2012_2775_MOESM7_ESM.pdf [file 125_2012_2775_MOESM7_ESM.pdf]

**ESM Table 4:** Mice phenotype, pancreas morphology and pancreatic cell proliferation at 12 weeks on control or HFD

| <b>Parameters</b>                              | <b>Control</b>                           | <b>HFD</b>                               | <b>P value</b> |
|------------------------------------------------|------------------------------------------|------------------------------------------|----------------|
| <b><i>Mice phenotype</i></b>                   |                                          |                                          |                |
| BMI (g/cm <sup>3</sup> )                       | 0.345±0.006                              | 0.484±0.016                              | <0.05          |
| Perirenal Fat (g)                              | 0.252±0.018                              | 1.012±0.13                               | <0.05          |
| Epididymal Fat (g)                             | 0.662±0.026                              | 2.981±0.49                               | <0.05          |
| <b><i>Pancreas morphology</i></b>              |                                          |                                          |                |
| Total endocrine area (%)                       | 0.17±0.038                               | 0.35±0.062                               | <0.05          |
| Number of islets (%)                           | 23.9±8.45                                | 46.8±5.61                                | ns             |
| % Small islets (0-5000µm <sup>2</sup> )        | 70.47±9.31                               | 49.34±5.64                               | <0.05          |
| % Medium islets (5000-10000µm <sup>2</sup> )   | 15.52±6.7                                | 29.53±5.3                                | ns             |
| % Large islets (>10000µm <sup>2</sup> )        | 7.8±4.49                                 | 17.23±4.06                               | <0.05          |
| Total β cell area (% of endocrine area)        | 92.79±0.84                               | 89.67±1.05                               | <0.05          |
| <b><i>Proliferation (BrdU 18h)</i></b>         |                                          |                                          |                |
| Total proliferation (% total cells)            | 27x10 <sup>-3</sup> ±43x10 <sup>-4</sup> | 14x10 <sup>-3</sup> ±24x10 <sup>-4</sup> | <0.05          |
| Endocrine proliferation (% of endocrine cells) | 0.144±0.053%                             | 0                                        | <0.05          |
